# Supplementary material
Source: PubMed Central journal article supplement (PMC5852672)

## Supplementary Appendix

This appendix has been provided by the authors to give readers additional information about their work.

Supplement to: Kyle RA, Larson DR, Therneau TM, et al. Long-term follow-up of monoclonal gammopathy of undetermined significance. *N Engl J Med* 2018;378:241-9. DOI: 10.1056/NEJMoa1709974

**Table of Contents**

**Figure S1.** Progression rate (per 100 person years) in patients with IgM MGUS.....3

**Figure S2.** Progression rate (per 100 person years) in patients with non-IgM MGUS.....4

**Figure S1.** Progression rate (per 100 person years) in patients with IgM MGUS

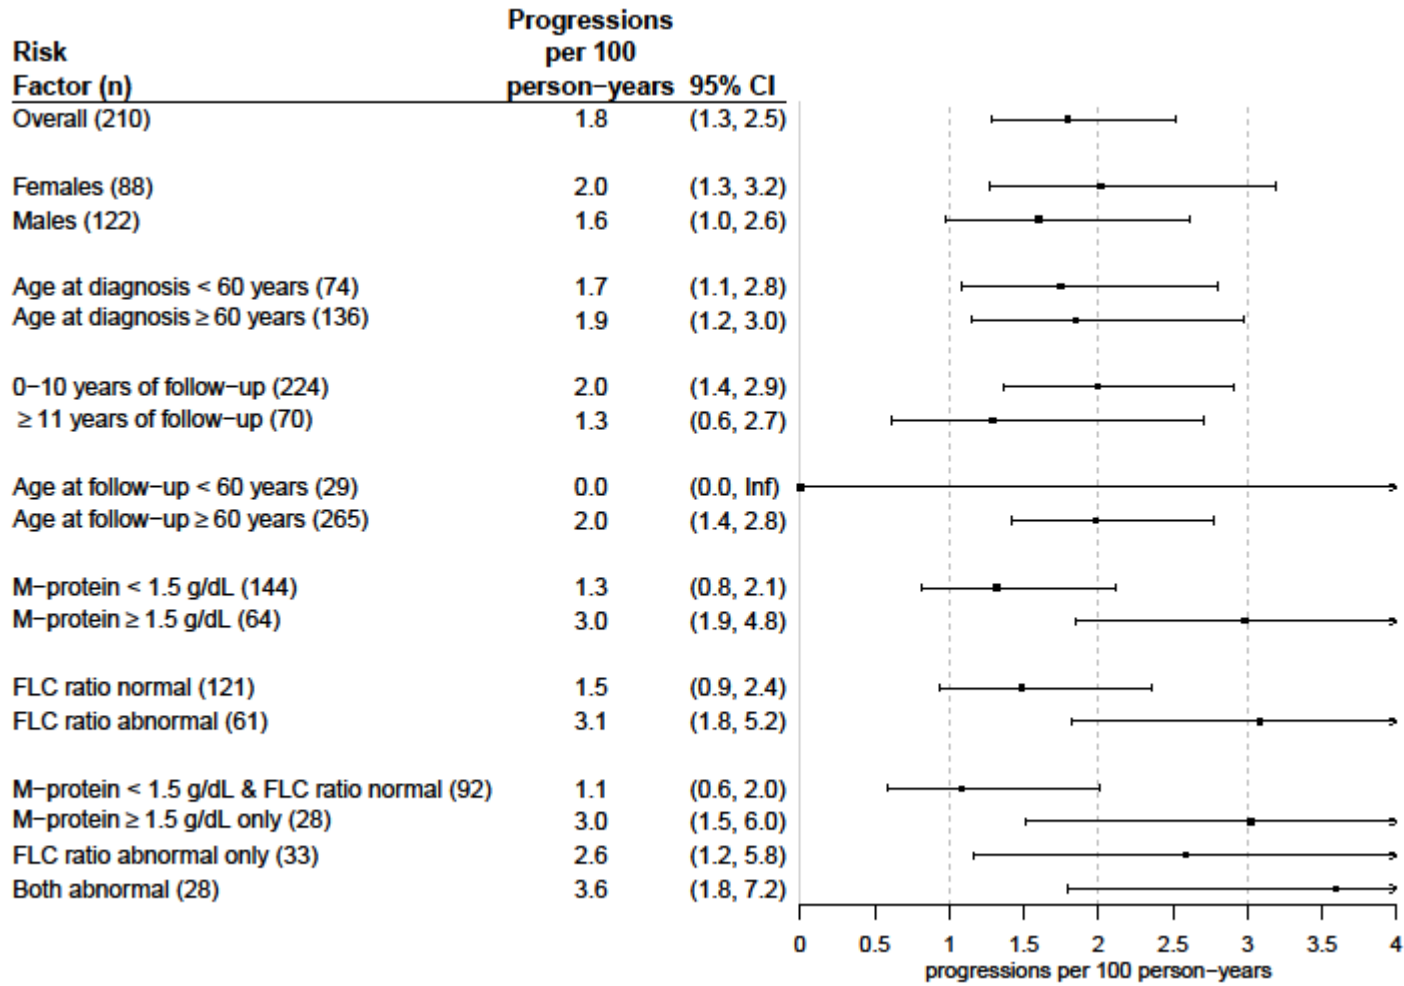

**Figure S2:** Progression rate (per 100 person years) in patients with non-IgM MGUS

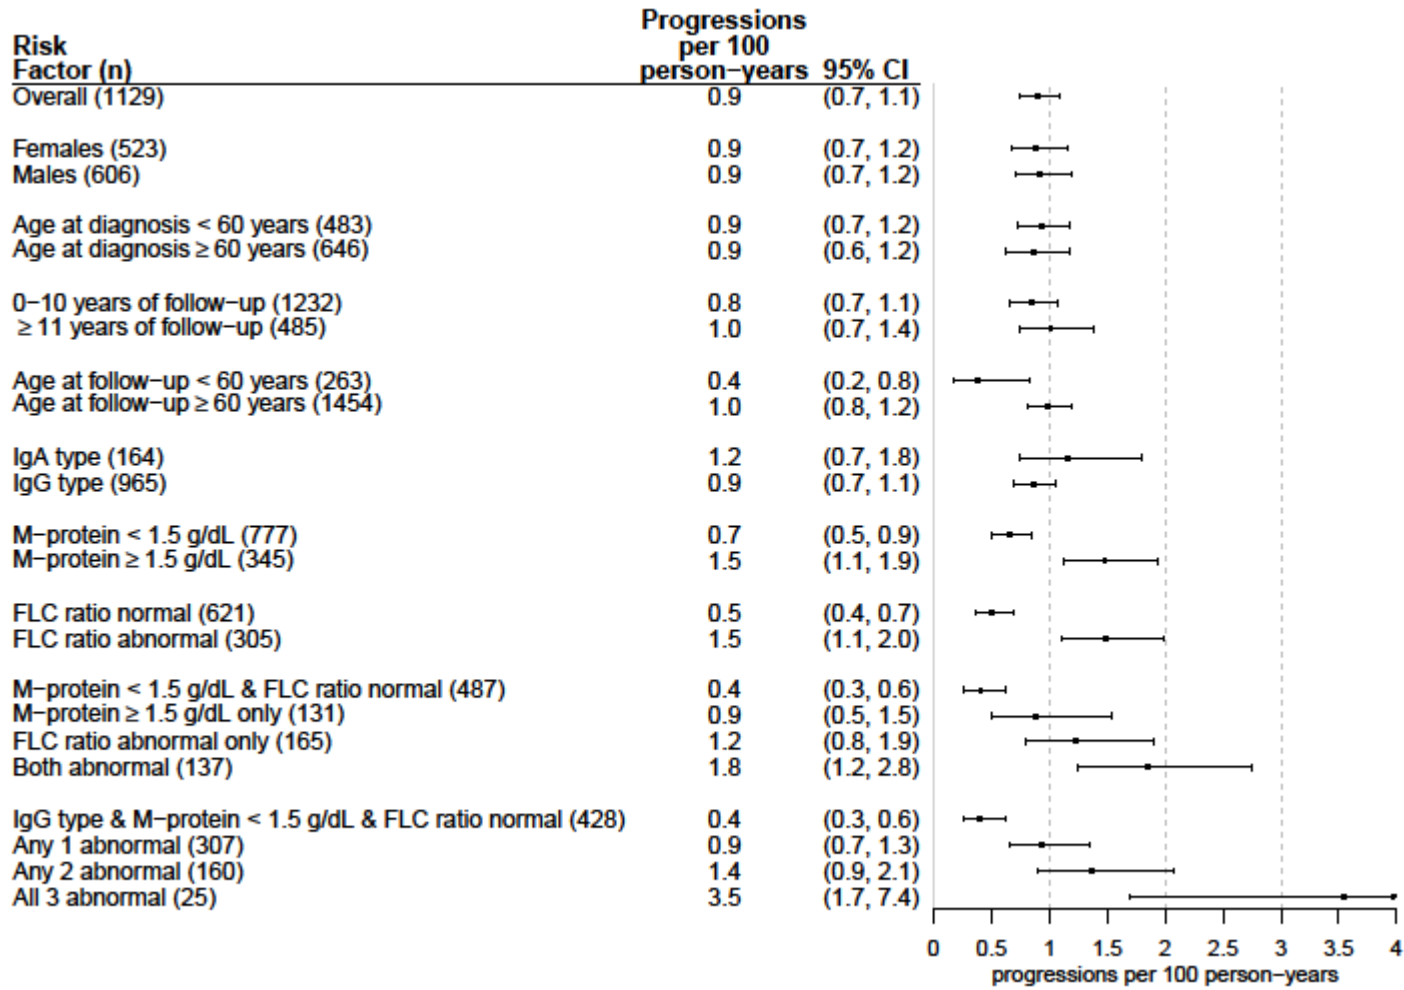

Supplement: NIHMS947733-supplement-Supplement1.pdf [file NIHMS947733-supplement-Supplement1.pdf]
